# Supplementary material for: Lemon Balm and Its Constituent, Rosmarinic Acid, Alleviate Liver Damage in an Animal Model of Nonalcoholic Steatohepatitis
Source: PubMed Central journal article supplement (PMC7230626; doi:10.3390/nu12041166), 2020-04-22
Supplement: nutrients-12-01166-s001.pdf [file nutrients-12-01166-s001.pdf]

**Supplementary Table 1.** Antibodies used for western blotting.

| Antibody                 | Company                  | Catalogue number |
|--------------------------|--------------------------|------------------|
| SREBP-1c                 | Santa Cruz Biotechnology | sc-366           |
| FAS                      | Santa Cruz Biotechnology | sc-715           |
| SCD1                     | Santa Cruz Biotechnology | sc-14719         |
| PPAR $\alpha$            | Santa Cruz Biotechnology | sc-9000          |
| PGC-1 $\alpha$           | Santa Cruz Biotechnology | sc-13067         |
| SOD1                     | Santa Cruz Biotechnology | sc-11407         |
| HO-1                     | Santa Cruz Biotechnology | sc-1796          |
| GAPDH                    | Santa Cruz Biotechnology | sc-32233         |
| CPT-1L                   | Abcam                    | ab128568         |
| Nrf2                     | Abcam                    | ab31163          |
| p-AMPK $\alpha$ (Thr172) | Cell signaling           | #2531            |
| AMPK $\alpha$            | Cell signaling           | #2532            |
| p-ACC (Ser79)            | Cell signaling           | #3661            |
| ACC                      | Cell signaling           | #3662            |
| p-LKB1 (Ser428)          | Cell signaling           | #3482            |
| LKB1                     | Cell signaling           | #3047            |
| p-CaMK2 (Thr286)         | Cell signaling           | #12716           |
| CaMK2                    | Cell signaling           | #3362            |

**Supplementary Table 2.** Primers used for real-time qRT-PCR

| <b>Gene</b>          | <b>Primer</b> | <b>Sequence</b>                   |
|----------------------|---------------|-----------------------------------|
| Human Nrf2           | Forward       | 5'-CAG CGA CCT TCG CAA ACA AC-3'  |
|                      | Reverse       | 5'-CAT GAT GAG CTG TGG ACC GT-3'  |
| Human SOD1           | Forward       | 5'-ATG GCG ACG AAG GCC GTG TG-3'  |
|                      | Reverse       | 5'-GAC CAC CAG TGT GCG GCC AA-3'  |
| Human catalase       | Forward       | 5'-AGC TTA GCG TTC ATC CGT GT-3'  |
|                      | Reverse       | 5'-TCC AAT CAT CCG TCA AAA CA-3'  |
| Human SREBP-1c       | Forward       | 5'-ACA TCG AAG GTG AAG TCG GC-3'  |
|                      | Reverse       | 5'-GGG AGG GCT TCC TGT AGA GA-3'  |
| Human FAS            | Forward       | 5'-CTC TTG GCC TTT TCC CGG TC-3'  |
|                      | Reverse       | 5'-CTC TGA AGC CCA AAG AGG GG-3'  |
| Human SCD-1          | Forward       | 5'-CCC TGC TTA CTT GGT GAG GG-3'  |
|                      | Reverse       | 5'-TGC CCT AGG CTG TAG GGA AT-3'  |
| Human PPAR $\alpha$  | Forward       | 5'-AGA AGC TGT CAC CAC AGT AGC-3' |
|                      | Reverse       | 5'-TGA AAG CGT GTC CGT GAT GA-3'  |
| Human PGC-1 $\alpha$ | Forward       | 5'-CTC AGT AAG GGG CTG GTT GC-3'  |
|                      | Reverse       | 5'-TCA CTG CAC CAC TTG AGT CC-3'  |
| Human CPT-1L         | Forward       | 5'-CAT ACG AGG CCT CCA TGA CC-3'  |
|                      | Reverse       | 5'-CCG TCT CAG GGC AAG AGA AC-3'  |
| Human $\beta$ -actin | Forward       | 5'-AGC CAT GTA CGT AGC CAT CC-3'  |
|                      | Reverse       | 5'-TCT CAG CTG TGG TGG TGA AG-3'  |
| Mouse SOD1           | Forward       | 5'-TGT GAC TGC TGG AAA GGA CG-3'  |
|                      | Reverse       | 5'-ACT GCG CAA TCC CAA TCA CT-3'  |
| Mouse Nrf2           | Forward       | 5'-AAG AAT AAA GTC GCC GCC CA-3'  |
|                      | Reverse       | 5'-AGA TAC AAG GTG CTG AGC CG-3'  |
| Mouse PPAR $\alpha$  | Forward       | 5'-CCG AAC ATT GGT GTT CGC AG-3'  |
|                      | Reverse       | 5'-AGA TAC GCC CAA ATG CAC CA-3'  |
| Mouse CPT-1L         | Forward       | 5'-GAC TCC GCT CGC TCA TTC C-3'   |
|                      | Reverse       | 5'-ACG CCA CTC ACG ATG TTC TT-3'  |
| Mouse SREBP1         | Forward       | 5'-CAG ACT CAC TGC TGC TGA CA-3'  |
|                      | Reverse       | 5'-CCT CCA CTC ACC AGG GTC T-3'   |
| Mouse FAS            | Forward       | 5'-CAA GTG TCC ACC AAC AAG CG-3'  |
|                      | Reverse       | 5'-GGA GCG CAG GAT AGA CTC AC-3'  |
| Mouse $\alpha$ -SMA  | Forward       | 5'-GTA CCC AGG CAT TGC TGA CA-3'  |
|                      | Reverse       | 5'-GAG GCG CTG ATC CAC AAA AC-3'  |
| Mouse COL1A1         | Forward       | 5'-CAC CCC AAT CTG GTT CCC TC-3'  |
|                      | Reverse       | 5'-CAT AAG CCA AGT GGG CAG GA-3'  |
| Mouse COL3A1         | Forward       | 5'-GAG GAA TGG GTG GCT ATC CG-3'  |

|               |         |                                   |
|---------------|---------|-----------------------------------|
| Mouse TIMP-1  | Reverse | 5'-TTG CGT CCA TCA AAG CCT CT-3'  |
|               | Forward | 5'-CAG ATA CCA TGA TGG CCC CC-3'  |
|               | Reverse | 5'-CGC TGG TAT AAG GTG GTC TCG-3' |
| Mouse TGFβ1   | Forward | 5'-ACT GGA GTT GTA CGG CAG TG-3'  |
|               | Reverse | 5'-GGA TCC ACT TCC AAC CCA GG-3'  |
| Mouse β-actin | Forward | 5'-TAA CCA ACT GGG ACG ATA TG-3'  |
|               | Reverse | 5'-ATA CAG GGA CAG CAC AGC CT-3'  |

---
